# Supplementary material
Source: PubMed Central journal article supplement (PMC3413268)
Supplement: NIHMS395359-supplement-1_si_001.pdf [file NIHMS395359-supplement-1_si_001.pdf]

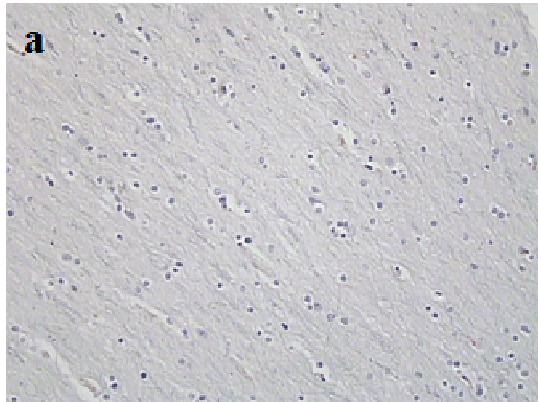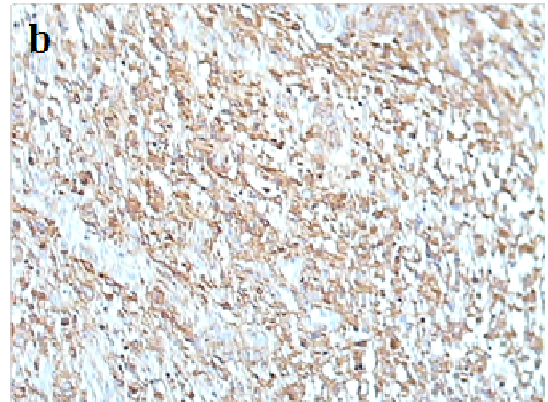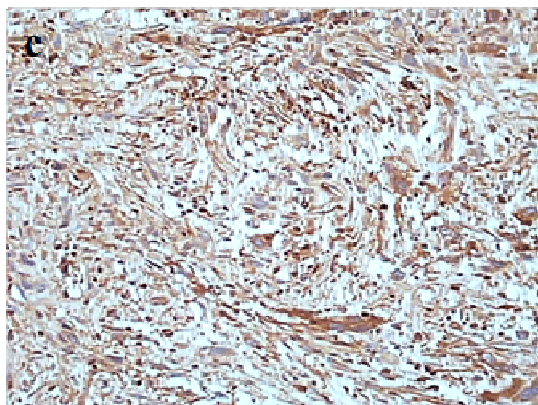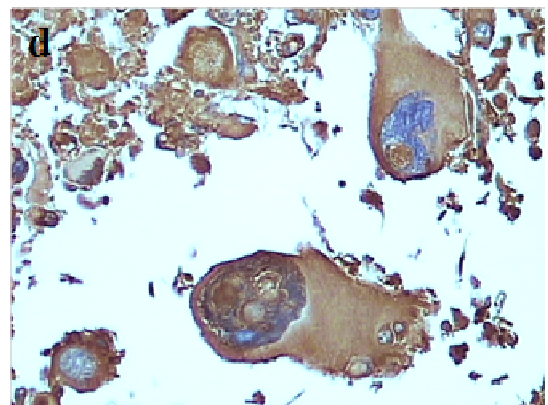

Figure 1 IHC staining images of IQGAP1 from (a) the normal cerebral tissue (the L6 core, original magnification x10), (b) the grade II astrocytoma (the D15 core, original magnification x10), (c) the grade III anaplastic astrocytoma (the F14 core, original magnification x10), and (d) the grade IV GBM (the K14 core of TMA shown in Fig. 9, original magnification x40).
